# Supplementary material for: Enhancement of Self-Monitoring in a Web-Based Weight Loss Program by Extra Individualized Feedback and Reminders: Randomized Trial
Source: PubMed Central journal article supplement (PMC4846785; doi:10.2196/jmir.4100), 2016-04-12
Supplement: jmir_v18i4e82_app1.pdf [file jmir_v18i4e82_app1.pdf]

**Multimedia Appendix 1**

**Table M1: Consistency of use of the commercial web-based weight loss programs self-monitoring tools (online diary to monitor food and exercise and weigh-ins) by treatment group (basic vs. enhanced) from Week 1 to 12**

| <b>Week</b>                                             | <b>Basic</b> | <b>Enhanced</b> | <b>Pearson<br/>chi-<br/>squared</b> | <b>P value</b> |       |
|---------------------------------------------------------|--------------|-----------------|-------------------------------------|----------------|-------|
| <i>Food entries to online diary</i>                     |              |                 |                                     |                |       |
| <b>Compliance: Proportion who used ≥3 days/week (%)</b> |              |                 |                                     |                |       |
| 1                                                       | 69.2         | 79.6            | 4.40                                | .036           |       |
| 2                                                       | 62.9         | 77.2            | 7.35                                | .007           |       |
| 3                                                       | 56.6         | 70.3            | 6.02                                | .014           |       |
| 4                                                       | 47.6         | 67.1            | 11.75                               | .001           |       |
| 5                                                       | 39.2         | 63.3            | 17.51                               | <.001          |       |
| 6                                                       | 37.1         | 55.1            | 9.78                                | .002           |       |
| 7                                                       | 30.8         | 52.5            | 14.58                               | <.001          |       |
| 8                                                       | 29.4         | 52.5            | 16.58                               | <.001          |       |
| 9                                                       | 27.3         | 51.3            | 18.03                               | <.001          |       |
| 10                                                      | 24.5         | 53.8            | 26.92                               | <.001          |       |
| 11                                                      | 28.7         | 48.1            | 11.93                               | .001           |       |
| 12                                                      | 28.7         | 46.8            | 10.49                               | .001           |       |
| <i>Exercise entries to online diary</i>                 |              |                 |                                     |                |       |
| <b>Compliance: Proportion who used ≥3 days/week (%)</b> |              |                 |                                     |                |       |
| 1                                                       |              | 36.4            | 46.2                                | 2.99           | .084  |
| 2                                                       |              | 39.9            | 48.7                                | 2.39           | .122  |
| 3                                                       |              | 33.6            | 39.2                                | 1.04           | .307  |
| 4                                                       |              | 26.6            | 40.5                                | 6.50           | .011  |
| 5                                                       |              | 23.8            | 37.3                                | 6.47           | .011  |
| 6                                                       |              | 21.0            | 33.5                                | 5.93           | .015  |
| 7                                                       |              | 17.5            | 31.0                                | 7.41           | .016  |
| 8                                                       |              | 17.5            | 36.1                                | 13.09          | <.001 |
| 9                                                       |              | 17.5            | 31.7                                | 18.05          | .005  |
| 10                                                      |              | 15.4            | 28.5                                | 7.44           | .006  |
| 11                                                      |              | 11.9            | 29.8                                | 14.30          | <.001 |
| 12                                                      |              | 16.8            | 24.1                                | 2.42           | .119  |
| <i>Weigh-ins</i>                                        |              |                 |                                     |                |       |
| <b>Compliance: Proportion who used 1 day/week (%)</b>   |              |                 |                                     |                |       |
| 1                                                       | 95.8         | 98.1            | 1.37                                | .24            |       |
| 2                                                       | 65.0         | 81.7            | 10.70                               | .001           |       |
| 3                                                       | 67.8         | 76.6            | 2.88                                | .09            |       |
| 4                                                       | 62.9         | 77.9            | 8.07                                | .01            |       |
| 5                                                       | 55.2         | 77.2            | 16.33                               | <.001          |       |
| 6                                                       | 54.6         | 69.6            | 7.28                                | .01            |       |
| 7                                                       | 45.5         | 69.0            | 17.04                               | <.001          |       |
| 8                                                       | 47.6         | 62.0            | 6.36                                | .01            |       |
| 9                                                       | 44.1         | 65.2            | 13.55                               | <.001          |       |
| 10                                                      | 39.2         | 63.3            | 17.51                               | <.001          |       |
| 11                                                      | 38.5         | 60.1            | 14.09                               | <.001          |       |
| 12                                                      | 45.5         | 57.0            | 3.98                                | .046           |       |

Chi-squared test  $X^2$  (2, 301) to compare the number of participants per group who used the self-monitoring tools
